# Supplementary material
Source: MDPI journal article supplement (https://www.mdpi.com/2073-4441/13/17/2431)
Supplement: s1 [file s1 › water-1327673-supplementary.pdf]

Supplementary material

Table S1. Questionnaire

| ID                              | Variables                                       | Structural value (for data analysis) | Definition (Legend values)                                                                                                                                                                                  |
|---------------------------------|-------------------------------------------------|--------------------------------------|-------------------------------------------------------------------------------------------------------------------------------------------------------------------------------------------------------------|
| <b>Farmers characteristics</b>  |                                                 |                                      |                                                                                                                                                                                                             |
| FS1                             | Age                                             | 1, 2, 3, 4, 5                        | If age of the farmer is between (years): Less than 40 years 1, 41-50 years 2, 51-60 years 3, More than 60 years 4, Retired 5                                                                                |
| FS2                             | Education                                       | 1, 2, 3, 4, 5                        | If the farmer is: Illiterate 1, primary school graduate 2, secondary-high school graduate 3, professional studies 4, higher studies 5                                                                       |
| FS3                             | Farming experience                              | 1, 2, 3, 4, 5                        | If the farmers experience is: Less than 5 years 1, 5-15 years 2, 16-29 years 3, 30-45 years 4, more than 45 years 5                                                                                         |
| FS4                             | Succession                                      | 0, 1, 2                              | If it is expected that someone (family member or outsider) will take care of the activity once the farmer was retired 1, if not (0) and unknown (2)                                                         |
| FS5                             | Union farm membership                           | 0, 1                                 | If the farmer is member of a union farm 1, if not 0                                                                                                                                                         |
| FS6                             | Beneficiary of agricultural subsidy (e.g., CAP) | 0, 1                                 | If the farmer is benefited from agricultural subsidies: No (0), Yes (1)                                                                                                                                     |
| <b>Farm characteristics</b>     |                                                 |                                      |                                                                                                                                                                                                             |
| FC1                             | Farm size                                       | 1, 2, 3, 4, 5                        | If the farmer' activity is developed in: Less than 1 ha 1, 1-5 ha 2, 6-10 ha 3, 11-20 ha 4, more than 20 ha 5                                                                                               |
| FC2                             | Main crop                                       | 1, 2, 3, 4, 5, 6, 7, 8, 9            | If the farmer mainly produces: Citrus 1, medlar 2, nuts-almonds 3, vegetables 4, oilseed-olives 5, ornamentals 6, pomegranate 7, melon 8, or mixed 9                                                        |
| FC3                             | Irrigation method                               | 1, 2, 3, 4                           | If the farmer applies: surface irrigation 1, drip irrigation 2, sprinkler irrigation 3, or mixed methods 4                                                                                                  |
| FC4                             | Annual water consumption                        | 0, 1, 2, 3, 4, 5                     | If the farmer consumes (year): Less than 1,000 m <sup>3</sup> 1, 1,001-2,000 m <sup>3</sup> 2, 2,001-5,000 m <sup>3</sup> 3, 5,001-10,000 m <sup>3</sup> 4, more than 10,000 m <sup>3</sup> 5, or no data 0 |
| FC5                             | Treated wastewater use                          | 0, 1                                 | If the farmer uses treated wastewater 1, if not 0                                                                                                                                                           |
| FC6                             | Treated wastewater quality standards            | 0, 1                                 | If the farmer considers that treated wastewater quality standards are good 1, if not 0, or unknown 2                                                                                                        |
| <b>Climate change awareness</b> |                                                 |                                      |                                                                                                                                                                                                             |

|                                    |                                                             |                  |                                                                                                                                                                                                                           |
|------------------------------------|-------------------------------------------------------------|------------------|---------------------------------------------------------------------------------------------------------------------------------------------------------------------------------------------------------------------------|
| PE1                                | Climate change is occurring                                 | 0, 1, 2          | Disagree (0), Agree (1), I do not know (2)                                                                                                                                                                                |
| PE2                                | Climate change is anthropogenic                             | 0, 1, 2          | Disagree (0), Agree (1), I do not know (2)                                                                                                                                                                                |
| PE3                                | Climate change poses agriculture at risk                    | 0, 1, 2          | Disagree (0), Agree (1), I do not know (2)                                                                                                                                                                                |
| PE4                                | Irrigated crops are exposed to climate change               | 0, 1, 2          | Disagree (0), Agree (1), I do not know (2)                                                                                                                                                                                |
| PE5                                | Awareness of warming                                        | 0, 1, 2          | No (0), Yes (1), I do not know (2)                                                                                                                                                                                        |
| PE6                                | Awareness of water shortage                                 | 0, 1, 2          | No (0), Yes (1), I do not know (2)                                                                                                                                                                                        |
| PE7                                | Awareness of extreme events (e.g., drought, floods)         | 0, 1, 2          | No (0), Yes (1), I do not know (2)                                                                                                                                                                                        |
| <b>Perceived Impacts</b>           |                                                             |                  |                                                                                                                                                                                                                           |
| IM1                                | Change in timing, intensity or frequency of rainfall events | 0, 1, 2          | No (0), Yes (1), I do not know (2)                                                                                                                                                                                        |
| IM2                                | Warmer temperatures and heatwaves                           | 0, 1, 2          | No (0), Yes (1), I do not know (2)                                                                                                                                                                                        |
| IM3                                | Increased frequency or intensity of droughts                | 0, 1, 2          | No (0), Yes (1), I do not know (2)                                                                                                                                                                                        |
| IM4                                | Less reliable water supply - water scarcity                 | 0, 1, 2          | No (0), Yes (1), I do not know (2)                                                                                                                                                                                        |
| IM5                                | Change in rate of land erosion                              | 0, 1, 2          | No (0), Yes (1), I do not know (2)                                                                                                                                                                                        |
| IM6                                | Decreased plant growth                                      | 0, 1, 2          | No (0), Yes (1), I do not know (2)                                                                                                                                                                                        |
| IM7                                | New diseases or pests                                       | 0, 1, 2          | No (0), Yes (1), I do not know (2)                                                                                                                                                                                        |
| IM8                                | Increase in weeds or invasive species                       | 0, 1, 2          | No (0), Yes (1), I do not know (2)                                                                                                                                                                                        |
| <b>Current adaptation measures</b> |                                                             |                  |                                                                                                                                                                                                                           |
| CA1                                | Soil conservation techniques                                | 0, 1, 2, 3, 4, 5 | If the farmer applies no-till farming and crop rotation and diversification (1), drought tolerant varieties (2), mixed cropping (3), changing planting dates (4), others (5), or Not (0)                                  |
| CA2                                | Use of treated wastewater                                   | 0, 1             | If the farmer considers the use of treated wastewater as a counterpoint to the river transfers: No (0), Yes (1)                                                                                                           |
| CA3                                | Invest in water technologies                                | 0, 1, 2, 3, 4    | If the farmer develops physical harvesting (1), promotes water efficiency through intermittent irrigation or water recycling techniques (2), introduces organizing mechanisms (water tariffs) (3), others (4), or Not (0) |

|                               |                                             |                     |                                                                                                                                              |
|-------------------------------|---------------------------------------------|---------------------|----------------------------------------------------------------------------------------------------------------------------------------------|
| CA4                           | Geoengineering                              | 0, 1                | If the farmer stands for applying geoengineering (like artificial modification of clouds system): No (0), Yes (1)                            |
| CA5                           | Agroforestry practices                      | 0, 1, 2, 3, 4, 5, 6 | If the farmer plants shaded trees (1), silvipasture (2), windbreaks (3), alley cropping systems (4), forest farming (5), others (6), Not (0) |
| CA6                           | Application of agro-chemicals               | 0, 1                | If the farmer applies agro-chemicals to face pests and diseases: No (0), Yes (1)                                                             |
| CA7                           | Agricultural insurance                      | 0, 1                | If the farmer contracts an insurance: No (0), Yes (1)                                                                                        |
| <b>Barriers to adaptation</b> |                                             |                     |                                                                                                                                              |
| BA1                           | Climate change skepticism                   | 0, 1, 2             | No (0), Yes (1), I do not know (2)                                                                                                           |
| BA2                           | Low risk perception                         | 0, 1, 2             | No (0), Yes (1), I do not know (2)                                                                                                           |
| BA3                           | Shock towards change                        | 0, 1, 2             | No (0), Yes (1), I do not know (2)                                                                                                           |
| BA4                           | Lack of information and data                | 0, 1, 2             | No (0), Yes (1), I do not know (2)                                                                                                           |
| BA5                           | High cost of investment and changing market | 0, 1, 2             | No (0), Yes (1), I do not know (2)                                                                                                           |
| BA6                           | Lack of government support                  | 0, 1, 2             | No (0), Yes (1), I do not know (2)                                                                                                           |
| BA7                           | Regulations and rules are too complicated   | 0, 1, 2             | No (0), Yes (1), I do not know (2)                                                                                                           |
| BA8                           | Lack of cooperation between stakeholders    | 0, 1, 2             | No (0), Yes (1), I do not know (2)                                                                                                           |
